# Supplementary material for: Enhanced spectrofluorimetric determination of hypochlorite based on the catalytic oxidation of thiamine to thiochrome in the presence of trace ferrocyanide
Source: Royal Society of Chemistry journal article supplement (doi:10.1039/c3ra46170j), 2013-12-20
Supplement: c3ra46170j.pdf [file c3ra46170j.pdf]

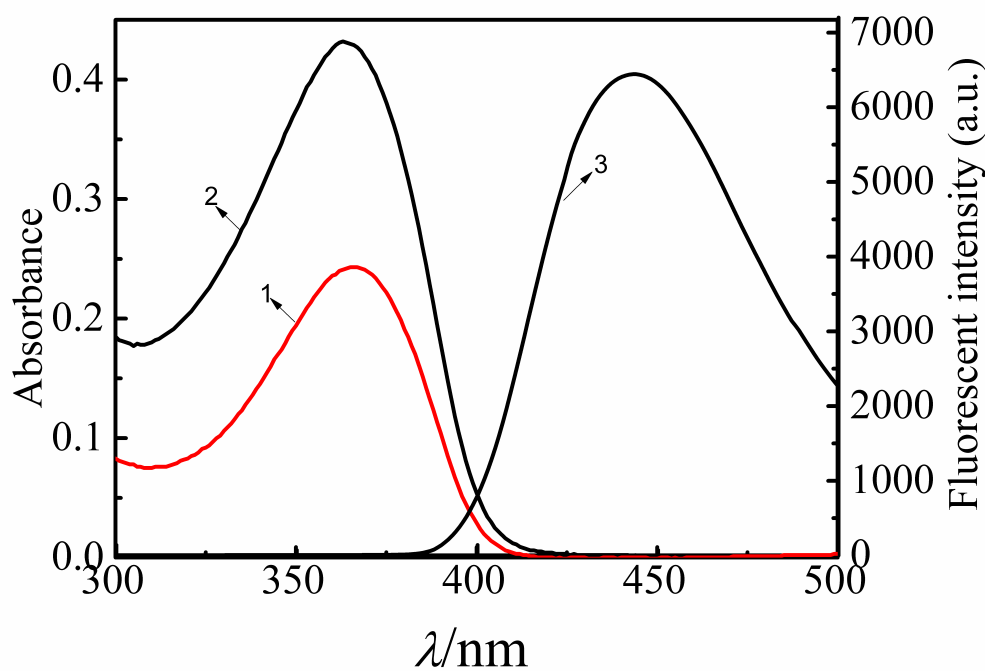

Fig. S1 Overlapping of absorption (1,2) and fluorescence spectra (3).  $C(\text{K}_4[\text{Fe}(\text{CN})_6])=2.0 \times 10^{-6} \text{ mol L}^{-1}$ ,  $C(\text{ClO}^-)=5.0 \times 10^{-4} \text{ mol L}^{-1}$ ; 1:  $C(\text{Thiamine})=2.5 \times 10^{-5} \text{ mol L}^{-1}$ ; (2,3):  $C(\text{Thiamine})=3.0 \times 10^{-5} \text{ mol L}^{-1}$ .
